# Supplementary material for: A dual-function phage regulator controls the response of cohabiting phage elements via regulation of the bacterial SOS response
Source: PubMed Central journal article supplement — Cell Rep. 2022 Apr 19;39(3):110723. doi: 10.1016/j.celrep.2022.110723 (PMC9043618; doi:10.1016/j.celrep.2022.110723), 2022-04-19
Supplement: mmc3.pdf [file mmc3.pdf]

**Supplementary Data 1: Cloning details of plasmids and mutants generated in this study. Related to STAR Methods.**

**pPL2-2920 (pPL2-ariS)**

1. PCR amplification of insert using *Lm 10403S* as template:

F-primer

AAAAGTGCAGTTAAATTATGACTTGATTGTGTTCTTC

R-primer

AAAAGTGCACATGTCAAATTTACAAGTAATTGCAAATG

Insert sequence:

AAAAGTCGACATGTCAAATTTACAAGTAATTGCAAATGATATGTTGCCAGTA  
ATGGAGAACGAAAAAGGCGAGAAATTCGTAATGCACGCGAACTACATCAA  
AGCTTGCAAGTCGGTAAAAAATTTGCTACTTGGATTACCGATAAGTTTAAACA  
ATTACGGATTTTCAAAGGATGAAGACTATTTCCCAATTTTGGGAGAAAGTAC  
ATTTGGCAGGCCTAGAACAGAATACTTACTAACTTTAGACACTGCTAAAGAA  
TTAGCAATGGTACAAAACAACGAAATGGGTCGATCAATTAGAAAATATTTCA  
TTGAAGTAGAAAAACAAGCGAGGAAATTAGCAACTGAATATCCAACGTTTTC  
ATACATGATAGAAGATCCAGTTGCTAGAGCTAAAAAATGGATTGAGGAACAA  
CAAGAGAAGCAAGAGGCTTTAAAGCAACTTGAGGAACAAAAGCCAAAAGTG  
GTTTTTGCAGGAACTGTGCAAACGAGTGAGAACACGATTTTAGTAAAAGATT  
TAGCTACTATTCTAAAACAAAAGGATTAGATATAGGACAAAACAGACTTTT  
TGAATGGTTGAGATGTAGCGGATATTTGCTAAATAAAGGGGCTTATTATAAC  
AAACCGTCACAAAAGGCGATGAATTTAGGATTGTTTGAACAAAAAACACATA  
TTCATACAGATAGAAATGGCTTAATGATAACTACCTATACACCTCGAGTTACT  
GGCAAAGGTCAAATATACCTATTAACAAATTATTAGAAGAACACAATCAAG  
TCATAATTTAACTGCAGTTTT

2. Restriction enzyme reaction of both insert and the vector *pPL2 tetR* by PstI and Sall enzymes
3. Ligation and transformation

**pPL1-2920**

1. PCR amplification of insert using *pPL2-2920* as template:

F-T3 primer

ATTAACCCTCACTAAAGGGA

R-primer

AAAAGTGCAGTTAAATTATGACTTGATTGTGTTCTTC

Insert sequence:

ATTAACCCTCACTAAAGGGAACAAAAGCTGGTACCGGGCCCTGAAGTTACCA  
TCACGGAAAAAGGTTATGCTGCTTTTAAAGACCCACTTTCACATTTAAGTTGTT  
TTTCTAATCCGCATATGATCAATTC AAGGCCGAATAAGAAGGCTGGCTCTGC

ACCTTGGTGATCAAATAATTCGATAGCTTGTCGTAATAATGGCGGCATACTAT  
 CAGTAGTAGGTGTTTCCCTTTCTTCTTTAGCGACTTGATGCTCTTGATCTTCCA  
 ATACGCAACCTAAAGTAAAATGCCCCACAGCGCTGAGTGCATATAATGCATT  
 CTCTAGTGAAAAACCTTGTTGGCATAAAAAGGCTAATTGATTTTCGAGAGTTT  
 CATACTGTTTTTCTGTAGGCCGTGTACCTAAATGTACTTTTGCTCCATCGCGAT  
 GACTTAGTAAAGCACATCTAAAACCTTTAGCGTTATTACGTAAAAAATCTTGC  
 CAGCTTTCCCTTCTAAAGGGCAAAGTGAGTATGGCGCCTATCTAACATCTC  
 AATGGCTAAGGCGTCGAGCAAAGCCCGCTTATTTTTTACATGCCAATACAAT  
 GTAGGCTGCTCTACACCTAGCTTCTGGGCGAGTTTACGGGTTGTTAAACCTTC  
 GATTCCGACCTCATTAAGCAGCTCTAATGCGCTGTTAATCACTTTACTTTTATC  
 TAATCTAGACATCATTAATTCCTCCTTTTTGTTGACACTCTATCATTGATAGAG  
 TTATTTGTCAAACCTAGTTTTTTATTTGGATCCCCTCGAGTTCATGAAAACTA  
 AAAAAAATATTGACACTCTATCATTGATAGAGTATAAATAAAATAAGCtTGAT  
 GggaaaggaggtgaGTCGACATGTCAAATTTACAAGTAATTGCAAATGATATGTTGC  
 CAGTAATGGAGAACGAAAAAGGCGAGAAATTCGTAAATGCACGCGAACTAC  
 ATCAAAGCTTGCAAGTCGGTAAAAAATTTGCTACTTGGATTACCGATAAGTTT  
 ACAAATTACGGATTTTCAAAGGATGAAGACTATTTCCCAATTTTGGGAGAAA  
 GTACATTTGGCAGGCCTAGAACAGAATACTTACTAACTTTAGACACTGCTAA  
 AGAATTAGCAATGGTACAAAACAACGAAATGGGTTCGATCAATTAGAAAATAT  
 TTCATTGAAGTAGAAAAACAAGCGAGGAAATTAGCAACTGAATATCCAACGT  
 TTTCATACATGATAGAAGATCCAGTTGCTAGAGCTAAAAAATGGATTGAGGA  
 ACAACAAGAGAAGCAAGAGGCTTTAAAGCAACTTGAGGAACAAAAGCCAAA  
 AGTGGTTTTTTCGGAAGCTGTGCAAACGAGTGAGAACACGATTTTAGTAAA  
 GATTTAGCTACTATTCTAAAACAAAAGGATTAGATATAGGACAAAACAGAC  
 TTTTGAATGGTTGAGATGTAGCGGATATTTGCTAAATAAAGGGGCTTATTAT  
 AACAAACCGTCACAAAAGGCGATGAATTTAGGATTGTTTGAACAAAAAACAC  
 ATATTCATACAGATAGAAATGGCTTAATGATAACTACCTATACACCTCGAGTT  
 ACTGGCAAAGGTCAAATATACCTATTAAACAAATTATTAGAAGAACACAATC  
 AAGTCATAATTTAACTGCAGTTTT

3. Restriction enzyme reaction of both insert and the vector *pPL1 tetR* by PstI and PspOMI enzymes
4. Ligation and transformation

### **pPL2-antA/B**

1. PCR amplification of insert using *pPL2-2920* as template:

F-primer

AAAAGTCGACATGTCAAATTTACAAGTAATTGCAAATG

R-primer

aaaaCTGCAGttaTTGCTTTAAAGCCTCTTGC

Insert sequence:

AAAAGTCGACATGTCAAATTTACAAGTAATTGCAAATGATATGTTGCCAGT  
 AATGGAGAACGAAAAAGGCGAGAAATTCGTAAATGCACGCGAACTACATC

AAAGCTTGCAAGTCGGTAAAAAATTTGCTACTTGGATTACCGATAAGTTTA  
ACAATTACGGATTTTCAAAGGATGAAGACTATTTCCCAATTTTGGGAGAAA  
GTACATTTGGCAGGCCTAGAACAAGAACTTACTAACTTTAGACACTGCTA  
AAGAATTAGCAATGGTACAAAACAACGAAATGGGTCGATCAATTAGAAAA  
TATTCATTGAAGTAGAAAAACAAGCGAGGAAATTAGCAACTGAATATCCA  
ACGTTTTTCATACATGATAGAAGATCCAGTTGCTAGAGCTAAAAAATGGATT  
GAGGAACAACAAGAGAAGCAAGAGGCTTTAAAGCAAtaaCTGCAGtttt

2. Restriction enzyme reaction of both insert and the vector *pPL2 tetR* by PstI and Sall enzymes
3. Ligation and transformation

### **pPL2-kilAC**

1. PCR amplification of insert using *pPL2-2920* as template:

F-primer

AAAAGTCGACATGGTACAAAACAACGAAATG

R-primer

AAAAGTGCAGTTAAATTATGACTTGATTGTGTTCTTC

Insert sequence:

AAAAGTCGACATGGTACAAAACAACGAAATGGGTCGATCAATTAGAAAATA  
TTTCATTGAAGTAGAAAAACAAGCGAGGAAATTAGCAACTGAATATCCAACG  
TTTTTCATACATGATAGAAGATCCAGTTGCTAGAGCTAAAAAATGGATTGAGG  
ACAACAAGAGAAGCAAGAGGCTTTAAAGCAACTTGAGGAACAAAAGCCAA  
AAGTGGTTTTTTCGGAAGCTGTGCAAACGAGTGAGAACACGATTTTAGTAAA  
AGATTTAGCTACTATTCTAAAACAAAAGGATTAGATATAGGACAAAACAGA  
CTTTTTGAATGGTTGAGATGTAGCGGATATTTGCTAAATAAAGGGGCTTATTA  
TAACAAACCGTCACAAAAGGCGATGAATTTAGGATTGTTTGAACAAAAACA  
CATATTCATACAGATAGAAATGGCTTAATGATAACTACCTATACACCTCGAGT  
TACTGGCAAAGGTCAAATATACCTATTAACAAATTATTAGAAGAACACAAT  
CAAGTCATAATTTAACTGCAGTTTT

2. Restriction enzyme reaction of both insert and the vector *pPL2 tetR* by PstI and Sall enzymes
3. Ligation and transformation

### **pPL2-gp42**

1. PCR amplification of insert using *Lm EGD-e* as template:

F-primer

AGTGTGATGGATATCTGCAGTTAAATTATGACTTGATTGTGTTCTTCTAATAACTTGTT  
TAATAGA

R-primer

GggaaaggaggtgaGTCGACATGTCAAATTTACAAGTAATTGCAAATGAAATGTTGCCAGTT  
TTAGAAAA

Insert sequence:

AGTGTGATGGATATCTGCAGTTAAATTATGACTTGATTGTGTTCTTCTAATAA  
CTTGTTTAATAGATATACTTGTCCCTTTTCCTGTTACTTGTGGAGTATAAAGTGGT  
TTTCATTAAGCCGTTTCTATCTGTATGAATATGTGTTTTTTGTTCAAACAATCC  
TAAGTTCATCGCCTTTTGGCGACGGTTTGTGTAATAAGCACCTTTACTTAGCA  
AATAACCGCTTCCCTCTCAGCCATTCAAAAAGCCTGTTTTGTCCATATCTAAT  
CCTTTTTGTTTTAGAAATAGTAGCTAAATCTTTTACTAAAATTGTGTTCTCACTC  
GTTTGCACAGCTTCCGCAAAAACACTTTTCGGCTTTTGTTCCTCAAGTTTTTTT  
AACACCTCTTGCTTTTCTTGTTGTTCCCTCTATCCATTTTTTAGCTCTAGCGACT  
GGATCTTCTATCATGTATGAAAATGCGGGATATTCAGTTGCTAATTTCCCTCGC  
TTGTTTTTCTACTTCAATGAAGTATTTTCTAATTGCTCGACCCATTTTCGTTGTT  
TTGCACCATTGCTAATTCTTTAGCAGTATCTAAAGTCAAAAAATAATTTGTTG  
ATGGTCGCCCATTTGGTTTTACTCAAAGTTGAGTAAAAGTCTAAACCATTCTCA  
TAACCATAATTTCCAATCATTCTATATATCCAATCATTAAATCTTGTATTTACT  
AAAAGCTTTTCATGAAGCATCCGGGCATCAACAAATTTTTCGCCTTGTTTCATT  
TTCTAAAACCTGGCAACATTTTCATTTGCAATTACTTGTAATTTGACATGTGCGA  
Ctcacctcctttcc

2. PCR amplification of Vector using *pPL2 tetR* as template:

F-primer

ACAATCAAGTCATAATTTAACTGCAGATATCCATCACACTGGC

R-primer

ATTACTTGTAATTTGACATGTCGACTcacct

Linearized Vector sequence:

ACAATCAAGTCATAATTTAACTGCAGATATCCATCACACTGGCGGCCGCTCGAGGGG  
ATCCACTAGTTCTAGAGCGGCCGCCACCGCGGTGGAGCTCCAATTCGCCCTATAGTG  
AGTCGTATTGACGTCGCTATTTAACGACCCTGCCCTGAACCGACGACCGGGTTCGAAT  
TTGCTTTCGAATTTCTGCCATTCATCCGCTTATTATCACTTATTCAGGCGTAGcAaCCA  
GGCGTTTAAGGGCACCAATAACTGCCTTAAAAAAATTACGCCCCGCCCTGCCACTCA  
TCGCAGTACTGTTGTAATTCATTAAGCATTCTGCCGACATGGAAGCCATCACAGACG  
GCATGATGAACCTGAATCGCCAGCGGCATCAGCACCTTGTCGCCTTGCGTATAATAT  
TTGCCCATGGTGAAAACGGGGGCGAAGAAGTTGTCCATATTGGCCACGTTTAAATCA  
AAACTGGTGAAACTCACCCAGGGATTGGCTGAGACGAAAAACATATTCTCAATAAA  
CCCTTTAGGGAAATAGGCCAGGTTTTACCGTAACACGCCACATCTTGCGAATATAT  
GTGTAGAAACTGCCGGAAATCGTCGTGGTATTCACTCCAGAGCGATGAAAACGTTTC  
AGTTTGCTCATGGAAAACGGTGTAACAAGGGTGAACACTATCCCATATCACAGCTC  
ACCGTCTTTCATTGCCATACGGAATTCGGATGAGCATTTCATCAGGCGGGCAAGAAT  
GTGAATAAAGGCCGGATAAACTTGTGCTTATTTTTCTTTACGGTCTTTAAAAAGGC  
CGTAATATCCAGCTGAACGGTCTGGTTATAGGTACATTGAGCAACTGACTGAAATGC  
CTCAAAATGTTCTTTACGATGCCATTGGGATATATCAACGGTGGTATATCCAGTGAT  
TTTTTCTCCATTTTAGCTTCCCTTAGCTCCTGAAAATCTCGATAACTCAAAAAATACG

CCCGGTAGTGATCTTATTTTCATTATGGTGAAAGTTGGAACCTCTTACGTGCCGATCA  
ACGTCTCATTTCGCCAAAAGTTGGCCAGGGCTTCCCGGTATCAACAGGGACACCA  
GGATTTATTTATTCTGCGAAGTGATCTTCCGTACAGGTATTTATTCGGCGCAAAGTG  
CGTCGGGTGATGCTGCCAACTTACTGATTTAGTGTATGATGGTGTTTTTGAGGTGCTC  
CAGTGGCTTCTGTTTCTATCAGCTGTCCCTCCTGTTTCAGCTACTGACGGGGTGGTGCC  
TAACGGCAAAGCACCGCCGGACATCAGCGCTAGCGGAGTGTATACTGGCTTACTA  
TGTTGGCACTGATGAGGGTGTGAGTGAAGTGCTTCATGTGGCAGGAGAAAAAAGGC  
TGCACCGGTGCGTCAGCAGAATATGTGATACAGGATATATTCCGCTTCCCTCGCTCAC  
TGACTCGCTACGCTCGGTGTTTCGACTGCGGCGAGCGGAAATGGCTTACGAACGGG  
GCGGAGATTTCTGGAAGATGCCAGGAAGATACTTAACAGGGAAGTGAGAGGGCCG  
CGGCAAAGCCGTTTTTCCATAGGCTCCGCCCCCTGACAAGCATCACGAAATCTGAC  
GCTCAAATCAGTGGTGGCGAAACCCGACAGGACTATAAAGATACCAGGCGTTTTCC  
CCTGGCGGCTCCCTCGTGCCTCTCCTGTTCTGCTTTCCGGTTTACCGGTGTCATTC  
CGCTGTTATGGCCGCGTTTGTCTCATTCCACGCCTGACACTCAGTTCCGGGTAGGCA  
GTTTCGCTCCAAGCTGGACTGTATGCACGAACCCCCCGTTCAGTCCGACCGCTGCGCC  
TTATCCGGTAACTATCGTCTTGAGTCCAACCCGGAAAGACATGCAAAAGCACCACTG  
GCAGCAGCCACTGGTAATTGATTTAGAGGAGTTAGTCTTGAAGTCATGCGCCGGTTA  
AGGCTAAACTGAAAGGACAAGTTTTGGTGACTGCGCTCCTCCAAGCCAGTTACCTCG  
GTTCAAAGAGTTGGTAGCTCAGAGAACCTTCGAAAACCGCCCTGCAAGGCGGTTTT  
TTCGTTTTTCAGAGCAAGAGATTACGCGCAGACCAAACGATCTCAAGAAGATCATCT  
TATTAATCAGATAAAATATTTCTAGATTTTCAGTGCAATTTATCTCTTCAAATGTAGCA  
CCTGAAGTCAGCCCCATACGATATAAGTTGTAATTTCTCCGCGCTTGCCCTCATCTGT  
TACGCCGCGGTAGCCGGCCAGCCTCGCAGAGCAGGATTCCCGTTGAGCACCGCCA  
GGTGCGAATAAGGGACAGTGAAGAAGGAACACCCGCTCGCGGGTGGGCTACTTCA  
CCTATCCTGCCCGGCTGACGCCGTTGGATACACCAAGGAAAGTCTACACGAACCTT  
TGGCAAATCCTGTATATCGTGCGAAAAGGATGGATATTCCGAAAAAATCGCTAT  
AATGACCCCGAAGCAGGGTTATGCAGCGGAAAAGCGCTGCTTCCCTGCTGTTTTGTG  
GAATATCTACCGACTGGAAACAGGCAAATGCAGGAAATTACTGAACTGAGGGGACA  
GGCGAGAGGCATGCGTGGAGGGAAAGAAGAACGCTGTTGAAAAAATCTTCTCTGGA  
CTACTTGAAACAAAAGAATTAAGTCATTTTATAAAAACCTTGAGAAAAACATCTT  
GATATAAAAACCTATTTATAACGAATATTTATTTCAATGTAATAATAAATAATTTA  
TTATTACATAAAATGTTTGTGGTATTATTTGTGGTATATATATCCTAAATGGCTTTAT  
ATCAGTGTGTGTTAATCCCTCTCAGGACGTTAAATAGTAATGTAAAGAAATCTCTAA  
AACGTTGAAAAGCCTTGATATTAAGGGCGGATGAATGTTTTGGAGTTTTTTTTATA  
TCGTATAATACCCGTTTTTATCCGTTGTTTTTGTGGCATTGTTGGTAAAATTTGTGGT  
ATTTTCATCTGTTTTTAGTGTGAAAAAGCATCTACTTTGGACTGATTATGTTGTCTT  
AAATTAGAGCTTAGATGACTATAGTATTTAATGTTGTATTAATGTCATCATGACCA  
AGCCTATCAGCTACATAAATAATATCCATACCCGCTTCTACACATAAGCCTGTATGC  
GTATGTCGTAGCTTGTGTAATGTCAGTGGTTCAGAATTGATTGTACTACATATCTTCT  
TCAAAGCTTTATTACAAGACGCGTTGTCTACTGGCTTATTGTGGTAAGTGATGAATA  
ATAACATCAATGGATTCTTAATAGCATGTTCCCTTCATATAATCAGTATGCCAATTCA  
AATACGAATGTAAATATTGAGCGGTAGAGTTATCAATATAGATCACTCGTGATTTTT  
TTGTTTTGGTATCAATGAATGTATTAGTGTACTTGTAATCCCAAGCTTTATTCACAGT  
TATTGAACGTTTAGTGAAATTAATATCCTTCTTTGTTAGTGCAATAATTTCTTCGAAC  
CTCATGCCTGTCTGGACAGCTAGAAAGATAACTGCTCGTGATATAGAATGAAATTT  
GCAAGTTCTTCTAATAGTAAATGAACTTTGTCTGTTCCATAAATTGTGCTTTATTTT

TCGCTACGTCCTGTCCGCTTATATGAGCCCCTATAGTGGGGTTTTTCTTCATGTAACC  
TAAATGAACAGCCTTGTTAAAAATCGCTCTAATTTTGCGGTGTCTGGTGTCTACAGT  
GGATATTGCATAGTCTACAGATAAATGATTAATAAATTGTTGATATTGAACCGCATC  
AATCGAATTAAGTTTAATTTTTTCATCGAAATAATCAACGAATTGATTATAAGCAAG  
ATCGTATAAATTAATAGTAGATTGACTACTTTTCCCATCTTTAAATGTTTTTCATGAAT  
AGCGTATAAAATCTTTGAAGTTCCATTCTTTCAGAGA ACTACTATCATGCTGAACTT  
GTTTTAATAATTTAGATGCTTTATACATTAAGTTTGTTCACTTGTATCTGTCAAACG  
CTTTTCTTTCCATTCACCATCGACTTTTATACGTAGGGCGAACACAATTTTACCGTTT  
GCTAATTTTTTTATCTTCATTAATACCACCACCTGTTTATTTTTGGAGATCTTTTTTTC  
AGAAAATCCCAGTACGTAATTAAGTATTTGAGAATTAATTTTATATTGATTAATACT  
AAGTTTACCCAGTTTTACCTAAAAACAAATGATGAGATAAATACTCCAAAGGCTA  
AAGAGGACTATACCAACTATTTGTAATAATTCTGTAACAGTTGAAAAGCGAACGTGT  
ATTCTTAGGGCTTGAGATGTACTGCTGGGTAAACCTTTATAGTGTAAGTGGGATGTG  
AACGTTAATCAACA ACTTTCGCTATGGGAAACCTATTGTTTTTTGTTAATAGAAAA  
CTTAATACATTTGTAATATAAAAACCGGCAGTTTTTCCGTTCTTCGTGACTCGAAATG  
AATTGCCAGATGAGTTTATGGTATTCTATAATAGAAGGTATGGAGGATGTTATATAA  
TGAGACAGAATTATGATGATCGAAAGCTAGCTTGGCACTGGCCGTCGTTTTACAACG  
TCGTGACTGGGAAAACCTGGCGTTACCCA ACTTAATCGCCTTGCAGCACATCCCC  
TTTCGCCAGCTGGCGTAATAGCGAAGAGGCCCGCACCCGATCGCCCTTCCCAACAGTT  
GCGCAGCCTGAATGGCGAATGGCGCCTGATGCGGTATTTTCTCCTTACGCATCTGTG  
CGGTATTTACACCCGCATATCAAATGGTTCGGATCTGGAGCTGTAATATAAAAACCT  
TCTTCAACTAACGGGGCAGGTTAGTGACATTAGAAAACCGACTGTAAAAAGTACAG  
TCGGCATTATCTCATATTATAAAAAGCCAGTCATTAGGCCTATCTGACAATTCCTGAA  
TAGAGTTCATAAA CAATCCTGCATGATAACCATCACAAACAGAATGATGTACCTGTA  
AAGATAGCGGTAAATATATTGAATTACCTTTATTAATGAATTTTCTCCTGCTGTAATAAT  
GGGTAGAAGGTAATTACTATTATTATTGATATTTAAGTTAAACCCAGTAAATGAAGT  
CCATGGAATAATAGAAAGAGAAAAAGCATTTCAGGTATAGGTGTTTTGGGAAACA  
ATTTCCCGAACCATTATATTTCTCTACATCAGAAAGGTATAAATCATAAAACTCTTT  
GAAGTCATTCTTTACAGGAGTCCAAATACCAGAGAATGTTTTAGATACACCATCAA  
AATTGTATAAAGTGGCTCTA ACTTATCCCAATAACCTAACTCTCCGTCGCTATTGTAA  
CCAGTTCTAAAAGCTGTATTTGAGTTTATCACCTTGTCACTAAGAAAATAAATGCA  
GGGTAAAATTTATATCCTTCTTGTTTTATGTTTCGGTATAAAAACACTAATATCAATTT  
CTGTGGTTATACTAAAAGTCGTTTGTGGTTCAAATAATGATTA AATATCTCTTTTCT  
CTTCCAATTGTCTAAATCAATTTTATTAAGTTCATTTGATATGCCTCCTAAATTTTT  
ATCTAAAGTGAATTTAGGAGGCTTACTTGTCTGCTTCTTCATTAGAATCAATCCTTT  
TTTAAAAGTCAATATTACTGTAACATAAATATATATTTTAAAATATCCCACTTTATC  
CAATTTTCGTTTGTGAACTAATGGGTGCTTTAGTTGAAGAATAAAGACCACATTAA  
AAAATGTGGTCTTTTGTGTTTTTTTAAAGGATTTGAGCGTAGCGAAAAATCCTTTTCT  
TTCTTATCTTGATAATAAGGGTAACTATTGCCAGATCCGAACCATTTGATATGGTG  
CACTCTCAGTACAATCTGCTCTGATGCCGCATAGTTAAGCCAGCCCCGACACCCGCC  
AACACCCGCTGACGCGCCCTGACGGGCTTGTCTGCTCCCGGCATCCGCTTACAGACA  
AGCTGTGACCGTCTCCGGGAGCTGCATGTGTCAGAGGTTTTACCGTCATCACCGAA  
ACGCGCGAGACGAAAGGGCCTCGTGATACGCCTATTTTTATAGGTTAATGTCATGAT  
ATAAATGGTTTCTTAGACGTCATTAACCTCACTAAAGGGAACAAAAGCTGGTACCG  
GGCCCTGAAGTTACCATCACGGAAAAAGGTTATGCTGCTTTTAAAGACCCACTTTCAC  
ATTTAAGTTGTTTTTCTAATCCGCATATGATCAATCAAGGCCGAATAAGAAGGCTG

GCTCTGCACCTTGGTGATCAAATAATTCGATAGCTTGTCGTAATAATGGCGGCATAC  
TATCAGTAGTAGGTGTTTCCCTTTCTTCTTTAGCGACTTGATGCTCTTGATCTTCCAAT  
ACGCAACCTAAAGTAAAATGCCCCACAGCGCTGAGTGCATATAATGCATTCTCTAGT  
GAAAAACCTTGTGGCATAAAAAGGCTAATTGATTTTCGAGAGTTTCATACTGTTTT  
TCTGTAGGCCGTGTACCTAAATGTACTTTTGCTCCATCGCGATGACTTAGTAAAGCA  
CATCTAAAACCTTTTAGCGTTATTACGTAAAAAATCTTGCCAGCTTTCCCCTTCTAAAG  
GGCAAAGTGAGTATGGCGCCTATCTAACATCTCAATGGCTAAGGCGTCGAGCAA  
GCCCCTTATTTTTTACATGCCAATACAATGTAGGCTGCTCTACACCTAGCTTCTGGG  
CGAGTTTACGGGTTGTTAAACCTTCGATTCCGACCTCATTAAAGCAGCTCTAATGCGC  
TGTTAATCACTTTACTTTTATCTAATCTAGACATCATTAAATCCTCCTTTTTGTTGACA  
CTCTATCATTGATAGAGTTATTTGTCAAAGTATTTTATTTGGATCCCCTCGAGTT  
CATGAAAACTAAAAAATATTGACACTCTATCATTGATAGAGTATAAAtTAAATA  
AGCtTGATGggaaaggaggtgaGTCGACATGTCAAATTTACAAGTAAT

3. Gibson Assembly and transformation

**pPL2-lin2418**

1. PCR amplification of insert using *Listeria innocua clip 11262* as template:

F-primer

GGATCCCCTCGAGCGGCCCGCCAGTGTGATGGATATCTGCAGtcaatttgctactaatgattgttctaa  
aaacttattacaagtacag

R-primer

AGAGTATAAAtTAAATAAGCtTGATGggaaaggaggtgaGTCGACatgacaaatttaaactcttcaatt  
ttaaggaagcaaagtaagaactgt

Insert sequence:

GGATCCCCTCGAGCGGCCCGCCAGTGTGATGGATATCTGCAGtcaatttgctactaatgatt  
gttctaaaaacttattacaagtacagttgacctttaccagtcacttttgcgtgatcgctgtatgtgccccactgatcetaaattgc  
agtttcttaacttgaagtcacaagtcctcatgctttctgcgtcggacgattgtagtcgctctcttctgaaatgagatagccgttc  
tggcgtaccattcaacaagcgttttcccaatgtctacaccgtttgttgatcaacttagcaagatcacggattaaaatggctc  
cctctgatcgttacagcgtctgcaataataactttggggtgctgcttctatttttctcagcctctaategcttggactttctctt  
taaggctcgttgccagctctgattaaaaagtcctgatcagtaattgcctctcagattgtgcatctgtcatgtatgcgccgtttacgaa  
tggacgtaagactcatccattaaccaattttcaattttctgcacttgtaaatctgatcttagaactaatataaacatcagattc  
gcttaataaccagttctctcgtggtctacctaacgaatcgttcaccaatgattcagcaggtttttacaatgatccctcatagcttttga  
ggattggagtaacctaatattgatgcaacatcaatgcctacaagaacggttctctcaagaattacagttcttactttgcttccttca  
aaattgaagagtttaattgtcatGTCGACtcacctctttccCATCAaGCTTATTTTAaTTATACTCT

2. PCR amplification of Vector using *pPL2 tetR* as template:

F-primer

ACAATCAAGTCATAATTTAACTGCAGATATCCATCACACTGGC

R-primer

ATTACTTGTAATTTGACATGTCGACtcacct

3. Gibson Assembly and transformation

## **ariS-Y99A mutant**

1. PCR amplification of two inserts using *Lm 10403S* as template:

F-primer

AAAAGGTACCGGAAAACAATTAAGAAAAGGAATTACAGC

R-primer

cgctgttttctacttcaatgaaAGCttttctaattgatcgaccattt

Fragment A sequence:

AAAAGGTACCGGAAAACAATTAAGAAAAGGAATTACAGCGGTAAATTAGATTTAAAAG  
CAGGATCATTGCCAGTTGTGCAAGTGGAAATATCACCCATTCACAATCAGCGAAGAAATGC  
GAAGACTGTTATGGTCTGGAAAATACTAAAAACCATAATTTAGGAGGAAGAAAAATGAA  
TAACATCAAACAAGCAATTATTAACTAGAAACAATTTTAGAAAATGGTAATGCGATAG  
AGAGCGGCTCATTTCGTTAAATACAGCGTTATAAAAAATATTTTAAATTTACTTGAAAAA  
GATCAAGAGCTAAAAATTATCGAAATGGAAGTAGAGCTGAATGGAGTAGAGGATTCTAT  
AGAAAACGCCGCTTTGTTAGAAAAGAGATTAAGTGAAGCCAAATCTTTGGTGGAAAGACT  
TGGCTAGCACTATAAACTCGTTAGAAATTAAGGTGAAGTGAttacttgattttacagtaaattcat  
tccCGCAATCGGGACATGAGTTTACTCCAGGTTTAACTGTAAATACATGTGAACATTCGG  
GACAGGTCCCTTCCGTTCCATTTTTAATAATATCTTCCTTGGCGATTTTTAGGCTTTGTT  
CTTTAATTTGTCTCTCTAATTTTTTTGAATCAAATTTAATTTTAACTCCATTTTACCCA  
CCTCCCTTCACAAAACTATAGCACTGTGAAAGGGCGAACAGAAAGGAGAACAAAATGT  
CAAATTTACAAGTAATTGCAAATGATATGTTGCCAGTAATGGAGAACGAAAAAGGCGAG  
AAATTCGTAAATGCACGCGAACTACATCAAAGCTTGCAAGTCGGTAAAAAATTTGCTAC  
TTGGATTACCGATAAGTTTAAACAATTACGGATTTTCAAAGGATGAAGACTATTTCCCAA  
TTTTGGGAGAAAGTACATTTGGCAGGCCTAGAACAGAATACTTACTAACTTTAGACACT  
GCTAAAGAATTAGCAATGGTACAAAACAACgaaatgggtcgatcaattagaaaaGCTttcattgaagta  
gaaaaacaagcg

F-primer

aaatgggtcgatcaattagaaaaGCTttcattgaagtagaaaaacaagcg

R-primer

AAAAGGATCCTTCTGAAATAGCTTGTTTTGCGG

Fragment B sequence:

aaatgggtcgatcaattagaaaaGCTttcattgaagtagaaaaacaagcgAGGAAATTAGCAACTGAATAT  
CCAACGTTTTTCATACATGATAGAAGATCCAGTTGCTAGAGCTAAAAAATGGATTGAGGA  
ACAACAAGAGAAGCAAGAGGCTTTAAAGCAACTTGAGGAACAAAAGCCAAAAGTGGTTT  
TTGCGGAAGCTGTGCAAACGAGTGAGAACACGATTTTAGTAAAAGATTTAGCTACTATT  
CTAAAACAAAAGGATTAGATATAGGACAAAACAGACTTTTTGAATGGTTGAGATGTAG  
CGGATATTTGCTAAATAAAGGGGCTTATTATAACAAACCGTCACAAAAGGCGATGAATT  
TAGGATTGTTTTGAACAAAAACACATATTCATACAGATAGAAATGGCTTAATGATAACT  
ACCTATACACCTCGAGTTACTGGCAAAGGTCAAATATACCTATTAACAAAATTATTAGA  
AGAACACAATCAAGTCATAATTTAAGCGCCGCTACCACAACGGCGCTCGCAGACAACAA  
TAGCCACGGGGAGCGACTAACAATAGTATATAACGATAAGTTGTTAATTAGTCGCTGAA  
AAATAACAAAAAAGGATTGAGATATTATGTTTTCAAAGATCAATATCAGCACCAACCGC  
GATGCAAGTTTTAGCAGAACTCGCACGAAAAAGAGCTAGCGATTGATAGTTATGTAA

CACCAGCACTAATAAGTAATCAGATAAAAAGGAAAACGAACAGTTTCACTTGAACAAGCA  
GAACAGTTAATTGATAGCTACAACGAACCAGAAAAGCACCTATTTATTTCGCACATGAATT  
TTCAAACGGAATGATACCGCCTTTGTTTGACGGCTTAGACAACCATCACGCTTCTTTAAC  
TAACCGCTTTGAACTAGAAGTTGAAGAAGCGATAAACACACTGAAAAACGGCTTAGAGA  
CGATGACATATAGCTTGAGAAAAGGTGACATGCTACAACGAGAAGCCGCAAAACAAGCT  
ATTTCAGAAGGATCCTTTT

2. Overlap extension PCR using both inserts as mutual template:

F-primer

AAAAGGTACCGGAAAACAATTAAGAAAAGGAATTACAGC

R-primer

AAAAGGATCCTTCTGAAATAGCTTGTTTTGCGG

Overlap extension PCR product sequence:

AAAAGGTACCGGAAAACAATTAAGAAAAGGAATTACAGCGGTAAATTAGATTTAAAAG  
CAGGATCATTGCCAGTTGTGCAAGTGAATATCACCCATTCACAATCAGCGAAGAAATGC  
GAAGACTGTTATGGTCTGGAAAATACTAAAAACCATAATTTAGGAGGAAGAAAAATGAA  
TAACATCAAACAAGCAATTATTAAGTAACTAGAAAACAATTTAGAAAATGGTAATGCGATAG  
AGAGCGGCTCATTCGTTAAATACAGCGTTATAAAAAATATTTTAAATTTACTTGAAAA  
GATCAAGAGCTAAAAATTATCGAAATGGAAGTAGAGCTGAATGGAGTAGAGGATTCTAT  
AGAAAACGCCGCTTTGTTAGAAAAGAGATTAAGTGAAGCCAAATCTTTGGTGGAAAGACT  
TGGCTAGCACTATAAACTCGTTAGAAATTAAGGTGAAGTGAttacttgattttacagtaaattcat  
tccCGCAATCGGGACATGAGTTTACTCCAGGTTTAACTGTAAATACATGTGAACATTCGG  
GACAGGTCCCTTCCGTTCCATTTTTAATAATATCTTCCTTGGCGATTTTTAGGCTTTGTT  
CTTTAATTTGTCTCTCTAATTTTTTTTGAATCAAATTTAATTTTAACTCCATTTTACCCA  
CCTCCCTTCACAAAACTATAGCACTGTGAAAGGGCGAACAGAAAGGAGAACAAAATGT  
CAAATTTACAAGTAATTGCAAATGATATGTTGCCAGTAATGGAGAACGAAAAAGGCGAG  
AAATTCGTAAATGCACGCGAACTACATCAAAGCTTGCAAGTCGGTAAAAAATTTGCTAC  
TTGGATTACCGATAAGTTTAAACAATTACGGATTTTCAAAGGATGAAGACTATTTCCCAA  
TTTTGGGAGAAAGTACATTTGGCAGGCCTAGAACAGAATACTTACTAACTTTAGACACT  
GCTAAAGAATTAGCAATGGTACAAAACAAGaaatgggtcgatcaattagaaaaGCTttcattgaagta  
gaaaaacaagcgAGGAAATTAGCAACTGAATATCCAACGTTTTTCATACATGATAGAAGATCC  
AGTTGCTAGAGCTAAAAAATGGATTGAGGAACAACAAGAGAAGCAAGAGGCTTTAAAGC  
AACTTGAGGAACAAAAGCCAAAAGTGGTTTTTTGCGGAAGCTGTGCAAACGAGTGAGAAC  
ACGATTTTAGTAAAAGATTTAGCTACTATTCTAAAACAAAAAGGATTAGATATAGGACA  
AAACAGACTTTTTGAATGGTTGAGATGTAGCGGATATTTGCTAAATAAAGGGGCTTATT  
ATAACAAACCGTCACAAAAGGCGATGAATTTAGGATTGTTTGAACAAAAACACATATT  
CATACAGATAGAAATGGCTTAATGATAACTACCTATACACCTCGAGTTACTGGCAAAGG  
TCAAATATACCTATTAACAAATTAATTAGAAGAACACAATCAAGTCATAATTTAAGCGC  
CGCCTACCACAACGGCGCTCGCAGACAACAATAGCCACGGGGAGCGACTAACAAATAGTAT  
ATAACGATAAGTTGTTAATTAGTCGCTGAAAAATAAACAAAAAAGGATTGAGATATTAT  
GTTTCAAAGATCAATATCAGCACCAACCGCGATGCAAGTTTTTAGCAGAACTCGCACGCA  
AAAAGAGCTAGCGATTGATAGTTATGTAACACCAGCACTAATAAGTAATCAGATAAAAAG  
GAAAACGAACAGTTTCACTTGAACAAGCAGAACAGTTAATTGATAGCTACAACGAACCA

GAAAGCACCTATTTATTCGCACATGAATTTTCAAACGGAATGATACCGCCTTTGTTTTGAC  
GGCTTAGACAACCATCACGCTTCTTTAACTAACCGCTTTGAACTAGAAGTTGAAGAAGCG  
ATAAACACACTGAAAAACGGCTTAGAGACGATGACATATAGCTTGAGAAAAGGTGACAT  
GCTACAACGAGAAGCCGCAAAACAAGCTATTTGAGAAGGATCCTTTT

3. Restriction enzyme reaction of both insert and the vector *pLR16* by KpnI and BamHI enzymes
4. Ligation and transformation

### **pPL2-ariS-Y99A**

1. PCR amplification of insert using *Lm ariS-Y99A* as template:

F-primer

AAAAGTGCAGTTAAATTATGACTTGATTGTGTTCTTC

R-primer

AAAAGTGCACATGTCAAATTTACAAGTAATTGCAAATG

Insert sequence:

AAAAGTCGACATGTCAAATTTACAAGTAATTGCAAATGATATGTTGCCAG  
TAATGGAGAACGAAAAAGGCGAGAAATTCGTAAATGCACGCGAACTACA  
TCAAAGCTTGCAAGTCGGTAAAAAATTTGCTACTTGGATTACCGATAAGT  
TTAACAATTACGGATTTTCAAAGGATGAAGACTATTTCCCAATTTTGGGA  
GAAAGTACATTTGGCAGGCCTAGAACAGAATACTTACTAACTTTAGACAC  
TGCTAAAGAATTAGCAATGGTACAAAACAACgaaatgggtcgaattagaaaaGCTtt  
cattgaagtagaaaaacaagcgAGGAAATTAGCAACTGAATATCCAACGTTTTTCATAC  
ATGATAGAAGATCCAGTTGCTAGAGCTAAAAAATGGATTGAGGAACAAC  
AAGAGAAGCAAGAGGCTTTAAAGCAACTTGAGGAACAAAAGCCAAAAGT  
GGTTTTTGCAGGAAAGCTGTGCAAACGAGTGAGAACACGATTTTAGTAAAAG  
ATTTAGCTACTATTCTAAAACAAAAGGATTAGATATAGGACAAAACAGA  
CTTTTTGAATGGTTGAGATGTAGCGGATATTTGCTAAATAAAGGGGCTTAT  
TATAACAAACCGTCACAAAAGGCGATGAATTTAGGATTGTTTGAACAAA  
AACACATATTCATACAGATAGAAATGGCTTAATGATAACTACCTATACAC  
CTCGAGTTACTGGCAAAGGTCAAATATACCTATTAAACAAATTATTAGAA  
GAACACAATCAAGTCATAATTTAACTGCAGTTTT

2. Restriction enzyme reaction of both insert and the vector *pPL2 tetR* by PstI and Sall enzymes
3. Ligation and transformation

### **pPL2-ariS -6his**

1. PCR amplification of insert using *Lm 10403S* as template:

F-primer

AAAAGTGCAGTTAAATTATGACTTGATTGTGTTCTTC



AATGGTACAAAACAACgaaatgggtcgatcaattagaaaaGCTtccattgaagtagaaaaacaagcgAGG  
AAATTAGCAACTGAATATCCAACGTTTTTCATACATGATAGAAAGATCCAGTTG  
CTAGAGCTAAAAAATGGATTGAGGAACAACAAGAGAAGCAAGAGGCTTTAA  
AGCAACTTGAGGAACAAAAGCCAAAAGTGGTTTTTGCAGGAAAGCTGTGCAAAC  
GAGTGAGAACACGATTTTAGTAAAAGATTTAGCTACTATTCTAAAACAAAA  
GGATTAGATATAGGACAAAACAGACTTTTTGAATGGTTGAGATGTAGCGGAT  
ATTTGCTAAATAAAGGGGCTTATTATAACAAACCGTCACAAAAGGCGATGAA  
TTTAGGATTGTTTGAACAAAAAACACATATTCATACAGATAGAAATGGCTTA  
ATGATAACTACCTATACACCTCGAGTTACTGGCAAAGGTCAAATATACCTATT  
AAACAAATTATTAGAAGAACACAATCAAGTCATAATTCTCGAGCACCACCAC  
CACCACCCTAACTGCAG

2. Restriction enzyme reaction of both insert and the vector *pPL2 tetR* by PstI and Sall enzymes
3. Ligation and transformation

### pPL2-recA

1. PCR amplification of insert using *Lm 10403S* as template:

F-primer

aaaaGTCGACgtgaatgatcgtaagcggc

R-primer

ttttCTGCAGttattcatcatctagtaaacttaattttctctttttcg

Insert sequence:

GTCGACgtgaatgatcgtaagcggcattagaccaagctttaaacaattgaaaaacaattcggtaaaggctccattatga  
aattaggggaacattcagatcaaatatctactatttctagtggttcattagcgttagatattgctttaggagttggcggataccctc  
gtggacgtattatcgaagtatacggaccagagagttccggtaaaacaactgttgcgctcatgcaattgcggaagtacaagcaca  
aggcggaaacagcagcatttatcgatgctgagcatgcggttgatccggcttatgctaaaaacctaggtgtaaatattgatgaattatt  
actatctcaaccagatacaggagaacaagctttagagattgctgaagctttagttagaagtgggtgcagttgatattgtagtaattgac  
tccggtgcagcactgtaccacgtgctgaaatcgaaggcgagatgggcatgctcatggttgattacaagcacgtttaatgtcca  
agcattgcgtaaacctttctggtttattaataaatcaaaaaccattgctattttcattaaccaaattcgtgaaaaagttggtttatggtt  
gtaaccagaaatcacaccaggtggacgtgcgcttaattctattctactgtacgtttagaagtaagacgtgcggaacaactgaag  
caaggtacagatgtaatgggtaacaaaacaaaatcaaagttgaaaaataaagtagcgcaccattccgtattgccgaagtag  
atattatgtatggtgaaggtatttcgctgaaggtgagcttgatgatggctgctgaagtgatgtaataaagagtggttcgtg  
gtattctataaagaagaacgcacggtcaaggccgtgagaatgcaaaacaatatctgaaagaacacacagatattcgtgatgag  
atttctaagcgcgttcgtgaagaatatgaattgatggaagcagcaagagcctcttgacgaaaaagaagaacattaagtttact  
agatgatgaataa

2. Restriction enzyme reaction of both insert and the vector *pPL2 tetR* by PstI and Sall enzymes
3. Ligation and transformation

## **pPL2-recA-ariS**

1. PCR amplification of insert using *ppl2-aris-6His* as template:

F-primer

aaaaaaCTGCAGGggaaggaggtgaGTCGACATG

R-primer

aaaaaaGAGCTCTTAGTGGTGGTGGTGGTGGTGC

Insert sequence:

ggaaggaggtgaGTCGACATGTCAAATTTACAAGTAATTGCAAATGATATGTTGCC  
AGTAATGGAGAACGAAAAAGGCGAGAAATTCGTAAATGCACGCGAACTACA  
TCAAAGCTTGCAAGTCGGTAAAAAATTTGCTACTTGGATTACCGATAAGTTTA  
ACAATTACGGATTTTCAAAGGATGAAGACTATTTCCCAATTTTGGGAGAAAG  
TACATTTGGCAGGCCTAGAACAGAATACTTACTAACTTTAGACACTGCTAAA  
GAATTAGCAATGGTACAAAACAACGAAATGGGTCGATCAATTAGAAAATATT  
TCATTGAAGTAGAAAAACAAGCGAGGAAATTAGCAACTGAATATCCAACGTT  
TTCATACATGATAGAAGATCCAGTTGCTAGAGCTAAAAAATGGATTGAGGAA  
CAACAAGAGAAGCAAGAGGCTTTAAAGCAACTTGAGGAACAAAAGCCAAAA  
GTGGTTTTTGC GGAAGCTGTGCAAACGAGTGAGAACACGATTTTAGTAAAAG  
ATTTAGCTACTATTCTAAAACAAAAAGGATTAGATATAGGACAAAACAGACT  
TTTTGAATGGTTGAGATGTAGCGGATATTTGCTAAATAAAGGGGCTTATTATA  
ACAAACCGTCACAAAAGGCGATGAATTTAGGATTGTTTGAACAAAAAACACA  
TATTCATACAGATAGAAATGGCTTAATGATAACTACCTATACACCTCGAGTTA  
CTGGCAAAGGTCAAATATACCTATTAACAAATTATTAGAAGAACACAATCA  
AGTCATAATTCTCGAGCACCACCACCACCACCTAA

2. Restriction enzyme reaction of both insert and the vector *pPL2 tetR-recA* by PstI and SacI enzymes
3. Ligation and transformation

## **lexA3 mutant**

1. PCR amplification of insert using *Lm 10403S* as template:

pBHE\_lexA3\_A aaaaGGATCCcacctctgaatagtcgcttccc

pBHE\_lexA3\_B gataggcatATcTgctgttacttttccgataataggaatatttac

pBHE\_lexA3\_C ggaaaagtaacagcAgATatgcctatcacagcaattgagaac

pBHE\_lexA3\_D ttttCTGCAGggccatattccaaggaagtcag

Insert sequence:

GATCCcacctctgaatagtcgcttccccgccaccactgtacacattaaaataatccctaaaacgatgcaagtaagtacaaatata  
atagaacataaaatttatcccaaatattttaaagtcattaataatccctccaaaaaagaatgtatgttcgcttttctatattatagaacaac  
cgttcgtacatgcaataaaaaaacgaaccttggttgcatattggttccctttgctatacttgaattataaaataaccataaatttaag

gtgaaacctgaaaatatctaaacgccacaagatatatgaatttattaaatcagaagtaaaagaaaagggtatccaccttccgtacg  
tgaattggtgaagcagtggtctcgcaccagttctactgttcatgggcatcttgccttgaaggtaaaagggttaatttagacgtga  
ccctacaaagcctcgtgcgattgaaatattatcttggagatgaagcagaaactcccaatggtgaaatattcctattatcgaaaagtaa  
cagcAgATatgcctatcacagcaattgagaacatcgatgagtattccactgccagaatacatggctgctggtgaaaccaatgtctt  
catgttagaaattgatggtaagatgataaatgccggaattcttgatggagataaagtaatcgtagacagcaaagttccgcaatcaat  
ggagaaatcgtcgtagctatgaccgatgaaaatgaagctacatgtaaacgattctataaagaagtaatacttcagacttcaaccgaa  
aatgatgctttagagcctattctttaataacgtaacaatccttggaaaagtaatcgggctttatagagatattcgtacttttatttctaaac  
aggtggttttaagatgatttattcgaaccgaaagactatcgcagagattttagaacgtgactaccttcttttagtcaaatgaatg  
cagatgaagaagtaataataacttcccagctagattgactcaagtagaaagtaacgcactacttgatagaacccaaaagaactgact  
tcccttgatagtgccCTGCA

2. Restriction enzyme reaction of both insert and the vector pBHE261 by BamHI and PstI
3. Ligation and transformation

### **pBHE-antA/B, for generating antA/B deletion mutant**

1. PCR amplification of insert using *Lm 10403S* and *pBHE261* as templates:

F vec : tgacggcttagacaacctcaattcgaatcatgcatagctgttctctg

R vec: agcagtttctatctcttgccttggcactggccg

A: ctatgacatgattacgaattgatggtgtctaaagccgtcaaca

B: tgcaaatctacaagtaattcttgaggacaaaagccaaaagtgg

C: ttggctttgttctcaagaattactgtaaatggacatttcttctcttctg

D: aaaacgacggccagtgccaagcaaggagatagaactgctgttatgg

Insert sequence:

gatggtgtcctaaagccgtcaacaaaggcggatcattccgttgaatcattgtgcgaataaaggtgcttctggttcgtttagctat  
caattaactgttctgcttcaagtgaaactgttcttcttcttctgattacttattagtgctggtgttacataactatcaatcgttagctct  
tttgcgtgcgagttctgctaaaacttgcacgcggttgggtgctgatattgatcttgaacataatctcaatccttttgttattttcagc  
gactaattaacaacttattctatatactattgtagtcgctccccgtggctattgttctgctgagcggcgttggtagggcggcgttaaa  
ttatgacttgattgttcttctaataatttgttaaataggtatattgaccttggcagtaactcaggtgataggtattatcattaagccatt  
ctatctgatgaatgtgttttgttcaacaatcctaaatcctcgcctttgtgacggttgttataaagcccttatttagcaaatatcc  
gctacatcaccattcaaaaagctgtttgtcctatataatccttttgtttagaatagtagctaaatctttactaaaaatcgtgttctcac  
tcgtttgacagcttccgcaaaaaccacttttggctttgttctcaagaattactgtaaatggacatttgttctcttctgttcgccccttca  
cagtgctatagttttgtgaagggaggtgggtaaaatgggagttaaaatgattcaaaaaaattagagagacaaataaagaaca  
aagcctaaaaatcccaaggaagatattataaaaatggaacggaaggacctgtcccgaatgttcacatgtattacagttaaacctg  
gagtaaacatgtcccattgctgggaatgaattactgtaaaaatcaagtaaatcactcacttaatttcaacgagttatagtgctagc  
caagcttccacaaaagattggcttcaactaactcttcttcaacaaagcggcgtttctatagaatccttactccattcagctcacttcca  
tttcgataatttttagctcttgccttttcaagtaaatfataatattttataacgctgtattaacgaatgagccgctctctatcgcattaccat  
tttctaaaattgttctagtttaataattgcttggatgtattcattttctcctcctaaattatggtttttagtattttccagaccataaacgtctt  
cgcatttctcgtgattgtgaatgggtgatattccactgcacaactggcaatgatcctgcttttaaatctaatfataaccgctgtaattccttt  
cttaattgttttccattgatttctaataactccataacagcagtttctatctccttgc

2. Gibson assembly and transformation

### **pBHE-kilAC, for generating kilAC deletion mutant**

1. PCR amplification of insert using *Lm 10403S* and *pBHE261* as templates:

F vec : acgaaggttacgagtcgaagttcgtaatcatgcatagctgttctctgtgaaattgt

R vec: agctcttgatcttttcaagcagcatgcaagcttg

A: agctatgacatgattacgaactcgactcgtaaccttcgtaact

B: acactgctaaagaattagcataagcggcgcctaccac

C: gttgtgtaggcggcgttatgctaattcttagcagtgctaaagttagtaagtattc

D: GGTACCTTACTTGATTTTTACAGTAAATTCATTCCC

Insert sequence:

gaactcgactcgtaaccttcgtaactagccgatactaaaacttcgctcattttccgcaactccttactaatccagattttgataatagat  
cgcgtttgtttaaaactgttgaaatctatgttgaaagcttcgcaatgctagtgtttagtgtaaaagcagatgcaactacatctgtatttctg  
aaatagctgttttgcggctctcgttgtagcatgtcaccttttcaagctatatgtcatcgtcttaagccgtttttagtggtttatcgcctc  
ttcaacttctagttcaaagcggtagttaaagaagcgtgatggtgtctaagccgtcaaacaagcggatcattccgttgaaaattcat  
gtgcgaataaataggtgctttctggttcgttgtagctatcaattaactgttctgcttgccaagtgaactgttcgtttctttatctgattactt  
attagtgtggtgttacataactatcaatcgttagctcttttgcgtgcgagtttctgctaaaacttgcacgcggttggtgctgatattgatct  
ttgaaacataatattcaatcctttttgtttttttcagcgactaattaacaacttategttatatactattgttagtcgctccccgtggctattgt  
tgtctgcgagcggcgttggttaggcggcgttatgctaattcttagcagtgctaaagttagtaagtattctgttctaggcctgccaat  
gtacttttcccaaaattgggaaatagcttcatcctttgaaaatccgtaattgttaaacttaccgtaataccaagtagcaaattttaccgac  
ttgcaagctttgatgtagttcgcgtgcatttacgaatttctgccttttctcctcattactggcaacatatcattgcaactactgtaaattt  
gacattttgttctcctttctgttcgccctttcacagtgcctatagttttgtgaagggaggtgggtaaaatgggagttaaaataaatttgattca  
aaaaaattagagagacaaattaaagaacaaagcctaaaaatgccaaaggaagatattataaaaatggaacggaagggacctgtccc  
gaatgttcacatgtatttacagttaaacctggagtaaacctatgtcccattgcgggaatgaatttactgtaaaaatcaagtaaatcacttc  
accttaatttctaacgagtttatagtgctagccaagcttccacaaagattggcttcaactaatctcttttctaacaagcggcgttttctat  
agaatcctctactccattcagctctacttccattcgataatttttagctcttgatcttttcaag

2. Gibson assembly and transformation
